# Supplementary material
Source: MDPI journal article supplement (https://www.mdpi.com/2073-4395/11/9/1791)
Supplement: s1 [file s1]

**Table S1.** Means data, standard deviation (SD), minimum (Min) and maximum (Max) value of fruits weight and color coordinates (CIElab) divided by cultivar (Kioto\* KM and Pieve\* PM), agronomic treatment (Business As Usual – BAU; Innovative diversified system with Natural cover and Compost use – ICC; Innovative diversified system with introduced Cover and Compost use – INC) and years.

|         |    |                   | Year 2019 |      |       |       | Year 2020 |       |       |       |
|---------|----|-------------------|-----------|------|-------|-------|-----------|-------|-------|-------|
| CV      | Tr |                   | Mean      | SD   | Min   | Max   | Mean      | SD    | Min   | Max   |
| W       | KM | BAU               | 33.0      | 6.2  | 27.0  | 43.9  | 29.9      | 11.7  | 27.0  | 43.9  |
|         |    | ICC               | 31.4      | 7.6  | 23.5  | 48.3  | 33.3      | 3.4   | 27.5  | 38.6  |
|         |    | INC               | 34.7      | 4.7  | 26.1  | 41.0  | 31.8      | 4.6   | 23.6  | 41.0  |
|         |    | <i>KM_Overall</i> | 33.0      | 6.2  | 25.5  | 44.4  | 31.7      | 6.6   | 26.0  | 41.2  |
|         | PM | BAU               | 33.6      | 4.1  | 29.8  | 43.5  | 27.5      | 11.6  | 23.8  | 43.9  |
|         |    | ICC               | 29.2      | 2.9  | 27.0  | 34.5  | 37.7      | 6.8   | 27.0  | 45.9  |
|         |    | INC               | 34.5      | 5.7  | 24.6  | 45.9  | 33.0      | 8.2   | 23.6  | 49.9  |
|         |    | <i>PM_Overall</i> | 32.4      | 4.2  | 27.1  | 41.3  | 32.7      | 8.9   | 24.9  | 46.6  |
| Skin L* | KM | BAU               | 53.54     | 3.24 | 49.58 | 58.75 | 49.22     | 17.37 | 50.78 | 56.16 |
|         |    | ICC               | 51.22     | 3.03 | 46.19 | 56.43 | 52.24     | 1.71  | 49.69 | 54.68 |
|         |    | INC               | 52.96     | 3.67 | 46.13 | 58.13 | 51.90     | 2.29  | 48.77 | 58.13 |
|         |    | <i>KM_Overall</i> | 52.76     | 2.83 | 47.30 | 57.77 | 51.12     | 7.12  | 49.75 | 56.32 |
|         | PM | BAU               | 49.59     | 3.57 | 44.21 | 55.17 | 44.53     | 15.97 | 42.01 | 53.71 |
|         |    | ICC               | 50.00     | 4.03 | 44.62 | 56.72 | 48.34     | 2.05  | 44.03 | 49.97 |
|         |    | INC               | 50.33     | 3.60 | 44.82 | 55.60 | 50.66     | 1.74  | 48.91 | 53.75 |
|         |    | <i>PM_Overall</i> | 49.87     | 3.84 | 44.55 | 55.83 | 47.84     | 6.59  | 44.99 | 52.48 |
| Skin a* | KM | BAU               | 20.46     | 3.32 | 13.56 | 26.57 | 19.04     | 6.96  | 17.82 | 23.82 |
|         |    | ICC               | 21.69     | 4.05 | 11.87 | 25.40 | 22.48     | 2.02  | 18.59 | 25.49 |
|         |    | INC               | 18.61     | 4.24 | 9.53  | 25.17 | 19.08     | 4.75  | 11.35 | 25.17 |
|         |    | <i>KM_Overall</i> | 20.58     | 3.75 | 11.65 | 25.71 | 20.20     | 4.58  | 15.92 | 24.82 |
|         | PM | BAU               | 18.97     | 6.59 | 6.73  | 27.09 | 15.33     | 8.46  | 4.96  | 29.64 |
|         |    | ICC               | 20.94     | 3.96 | 14.78 | 25.71 | 20.08     | 3.37  | 15.44 | 26.63 |
|         |    | INC               | 19.11     | 5.03 | 7.44  | 25.12 | 18.46     | 3.85  | 11.27 | 25.14 |
|         |    | <i>PM_Overall</i> | 19.93     | 5.00 | 9.65  | 25.97 | 17.96     | 5.23  | 10.56 | 27.14 |
| Skin b* | KM | BAU               | 34.62     | 4.86 | 27.95 | 44.68 | 32.75     | 11.72 | 31.46 | 40.50 |
|         |    | ICC               | 33.27     | 4.45 | 25.60 | 41.36 | 36.02     | 3.12  | 30.51 | 41.46 |
|         |    | INC               | 33.51     | 5.90 | 22.20 | 42.63 | 32.14     | 3.59  | 27.08 | 42.63 |
|         |    | <i>KM_Overall</i> | 33.80     | 5.07 | 25.25 | 42.89 | 35.16     | 5.24  | 29.68 | 41.53 |
|         | PM | BAU               | 29.53     | 4.39 | 23.59 | 36.93 | 25.97     | 9.73  | 21.49 | 34.25 |
|         |    | ICC               | 31.75     | 5.19 | 25.22 | 39.70 | 28.84     | 2.36  | 24.83 | 32.15 |
|         |    | INC               | 31.11     | 4.02 | 26.17 | 36.51 | 31.37     | 2.42  | 28.64 | 35.96 |
|         |    | <i>PM_Overall</i> | 30.79     | 4.53 | 24.99 | 37.71 | 28.73     | 4.84  | 24.99 | 34.12 |
| Pulp L* | KM | BAU               | 56.44     | 1.26 | 54.67 | 58.09 | 50.69     | 17.85 | 53.57 | 58.13 |
|         |    | ICC               | 53.93     | 3.98 | 47.47 | 57.95 | 54.77     | 2.71  | 50.97 | 58.22 |
|         |    | INC               | 56.52     | 2.53 | 53.01 | 59.54 | 55.33     | 2.94  | 50.05 | 59.54 |
|         |    | <i>KM_Overall</i> | 55.57     | 2.70 | 51.72 | 58.53 | 53.60     | 7.84  | 51.53 | 58.63 |
|         | PM | BAU               | 54.57     | 2.37 | 48.85 | 56.74 | 49.14     | 17.32 | 51.98 | 56.89 |
|         |    | ICC               | 53.82     | 2.92 | 47.27 | 56.51 | 52.97     | 2.32  | 49.67 | 56.70 |
|         |    | INC               | 54.35     | 2.98 | 48.48 | 58.93 | 54.45     | 2.67  | 50.32 | 58.23 |
|         |    | <i>PM_Overall</i> | 54.25     | 2.76 | 48.20 | 57.40 | 52.19     | 7.44  | 50.66 | 57.27 |
| Pulp a* | KM | BAU               | 12.40     | 0.96 | 11.14 | 13.89 | 11.19     | 4.03  | 11.21 | 14.45 |
|         |    | ICC               | 12.79     | 4.05 | 4.87  | 18.40 | 13.97     | 3.09  | 10.06 | 18.49 |
|         |    | INC               | 12.45     | 3.29 | 7.08  | 18.17 | 11.87     | 3.88  | 6.08  | 18.17 |
|         |    | <i>KM_Overall</i> | 12.64     | 2.92 | 7.70  | 16.82 | 12.34     | 3.67  | 9.12  | 17.03 |
|         | PM | BAU               | 12.88     | 1.61 | 10.01 | 14.85 | 8.79      | 5.63  | -2.04 | 15.04 |
|         |    | ICC               | 11.84     | 1.80 | 8.21  | 14.30 | 11.47     | 2.13  | 8.44  | 14.40 |
|         |    | INC               | 11.75     | 3.03 | 6.24  | 15.17 | 11.56     | 2.72  | 7.38  | 15.13 |
|         |    | <i>PM_Overall</i> | 12.38     | 2.89 | 8.15  | 14.78 | 10.60     | 3.49  | 4.60  | 14.86 |
| Pulp b* | KM | BAU               | 41.28     | 1.12 | 39.77 | 43.44 | 37.20     | 13.11 | 39.46 | 42.97 |
|         |    | ICC               | 38.55     | 4.38 | 30.60 | 46.36 | 40.17     | 2.97  | 35.51 | 46.46 |
|         |    | INC               | 41.13     | 3.36 | 35.74 | 47.63 | 39.76     | 3.41  | 32.89 | 47.63 |
|         |    | <i>KM_Overall</i> | 40.35     | 3.02 | 35.37 | 45.81 | 39.04     | 6.49  | 35.95 | 45.69 |
|         | PM | BAU               | 40.51     | 3.47 | 31.57 | 42.55 | 36.04     | 13.01 | 34.61 | 43.24 |
|         |    | ICC               | 39.82     | 4.12 | 30.22 | 44.70 | 38.58     | 3.16  | 33.45 | 41.72 |
|         |    | INC               | 39.44     | 3.86 | 31.38 | 42.81 | 39.69     | 3.58  | 34.60 | 45.00 |
|         |    | <i>PM_Overall</i> | 39.68     | 3.46 | 31.05 | 43.35 | 38.10     | 6.58  | 34.22 | 43.32 |

Legend: W = weight (g)

**Table S2.** Means data, standard deviation (SD), minimum (Min) and maximum (Max) value of SSC:TA divided by cultivar (Kioto\* KM and Pieve\* PM), agronomic treatment (Business As Usual – BAU; Innovative diversified system with Natural cover and Compost use – ICC; Innovative diversified system with introduced Cover and Compost use – INC) and years.

| Year 2019 |               |      |     |     |     |     | Year 2020 |     |     |     |
|-----------|---------------|------|-----|-----|-----|-----|-----------|-----|-----|-----|
| CV        | Tr            | Mean | SD  | Min | Max |     | Mean      | SD  | Min | Max |
| SSC:TA    | KM            | BAU  | 0.8 | 0.0 | 0.7 | 0.9 | 0.7       | 0.3 | 0.6 | 1.1 |
|           |               | ICC  | 1.1 | 0.2 | 0.8 | 1.4 | 0.7       | 0.1 | 0.5 | 0.9 |
|           |               | INC  | 1.0 | 0.2 | 0.8 | 1.3 | 1.1       | 0.1 | 0.9 | 1.3 |
|           | PM            | BAU  | 0.9 | 0.1 | 0.7 | 1.1 | 0.7       | 0.3 | 0.7 | 0.9 |
|           |               | ICC  | 1.0 | 0.2 | 0.8 | 1.3 | 0.8       | 0.2 | 0.6 | 1.0 |
|           |               | INC  | 1.1 | 0.2 | 0.8 | 1.3 | 1.0       | 0.2 | 0.8 | 1.2 |
|           | Overall means |      | 1.0 | 0.2 | 0.8 | 1.2 | 0.8       | 0.2 | 0.7 | 1.1 |

Legend: SSC = soluble solids content; TA = titratable acidity
